# Supplementary material for: Brain inflammation triggers macrophage invasion across the blood-brain barrier in Drosophila during pupal stages
Source: PubMed Central journal article supplement — Sci Adv. 2021 Oct 27;7(44):eabh0050. doi: 10.1126/sciadv.abh0050 (PMC8550232; doi:10.1126/sciadv.abh0050), 2021-10-27

Supplementary Materials for

**Brain inflammation triggers macrophage invasion across the blood-brain barrier in *Drosophila* during pupal stages**

Bente Winkler, Dominik Funke, Billel Benmimoun, Pauline Spéder, Simone Rey,  
Mary A. Logan, Christian Klämbt\*

\*Corresponding author. Email: [klaembt@uni-muenster.de](mailto:klaembt@uni-muenster.de)

Published 27 October 2021, *Sci. Adv.* **7**, eabh0050 (2021)  
DOI: [10.1126/sciadv.abh0050](https://doi.org/10.1126/sciadv.abh0050)

**This PDF file includes:**

Figs. S1 to S8

## Fig. S1 qPCR data

**A)** Brains of wandering third instar *Drosophila* larvae with pan-gial expression of PGRP-LC were subjected to quantitative real-time PCR (*PGRP-LC*, *Pvf2*, *AttacinD*, *Diptericin*, *Defensin*, *Metchnikowin*, (n = 4)). PGRP-LC efficiently activates expression of all AMPs tested.  $p_{\text{PGRP-LC}} = 0.0018$ ;  $p_{\text{Pvf2}} = 0.0125$ ;  $p_{\text{AttD}} = 0.0011$ ;  $p_{\text{DptB}} = 0.0286$ ;  $p_{\text{Def}} < 0.0001$ ;  $p_{\text{Mtk}} = 0.0018$ , (all p values were obtained using a t-test, except for *DptB* for which a Mann-Whitney test was used). Pupal stages could not be analyzed due to lethality. **(B)** Brains of wandering third instar larvae and different pupal stages with pan-gial expression of PGRP-LE were subjected to quantitative real-time PCR (*PGRP-LE*, *Pvf2*, *AttacinD*, *Diptericin*, *Defensin*, *Metchnikowin*, (n = 4)).  $p_{\text{PGRP-LE larvae}} = 0.0021$ ,  $p_{\text{PGRP-LE 5-12hAPF}} < 0.0001$ ,  $p_{\text{PGRP-LE 15-18hAPF}} = 0.0245$ ;  $p_{\text{Pvf2 larvae}} = 0.0007$ ,  $p_{\text{Pvf2 5-12hAPF}} = 0.0286$ ,  $p_{\text{Pvf2 15-18hAPF}} = 0.1071$ ;  $p_{\text{AttD larvae}} < 0.0001$ ,  $p_{\text{AttD 5-12hAPF}} = 0.0003$ ,  $p_{\text{AttD 15-18hAPF}} < 0.0001$ ;  $p_{\text{DptB larvae}} = 0.0286$ ,  $p_{\text{DptB 5-12hAPF}} = 0.0092$ ,  $p_{\text{DptB 15-18hAPF}} = 0.0004$ ;  $p_{\text{Def larvae}} = 0.0002$ ,  $p_{\text{Def 5-12hAPF}} < 0.0001$ ,  $p_{\text{Def 15-18hAPF}} = 0.2378$ ;  $p_{\text{Mtk larvae}} = 0.0119$ ,  $p_{\text{Mtk 5-12hAPF}} = 0.0006$ ,  $p_{\text{Mtk 15-18hAPF}} < 0.0001$ ; (all p values were obtained using a t-test, except for *DptB* (larvae), and *Pvf2* (young pupae) for which a Mann-Whitney test was used). **(C)** Brains of wandering third instar larvae and different pupal stages with pan-gial expression of PGRP-SA / GNBP1 were subjected to quantitative real-time PCR (*PGRP-SA*, *Pvf2*, *AttacinD*, *Diptericin*, *Defensin*, *Metchnikowin*, (n = 4)).  $p_{\text{PGRP-SA larvae}} = 0.0035$ ,  $p_{\text{PGRP-SA 5-12hAPF}} < 0.0001$ ,  $p_{\text{PGRP-SA 15-18hAPF}} = 0.0005$ ;  $p_{\text{Pvf2 larvae}} = 0.0131$ ,  $p_{\text{Pvf2 5-12hAPF}} = 0.3429$ ,  $p_{\text{Pvf2 15-18hAPF}} = 0.1781$ ;  $p_{\text{AttD larvae}} = 0.6571$ ,  $p_{\text{AttD 5-12hAPF}} = 0.0089$ ,  $p_{\text{AttD 15-18hAPF}} = 0.0018$ ;  $p_{\text{DptB larvae}} = 0.0286$ ,  $p_{\text{DptB 5-12hAPF}} = 0.1163$ ,  $p_{\text{DptB 15-18hAPF}} = 0.3946$ ;  $p_{\text{Def larvae}} > 0.9999$ ,  $p_{\text{Def 5-12hAPF}} = 0.0771$ ,  $p_{\text{Def 15-18hAPF}} = 0.2187$ ;  $p_{\text{Mtk larvae}} = 0.6933$ ,  $p_{\text{Mtk 5-12hAPF}} = 0.0354$ ,  $p_{\text{Mtk 15-18hAPF}} = 0.4857$ ; (all p values were obtained using a t-test, except for *Pvf2* (young pupae), *AttD* (larvae), *DptB* (larvae), *DptB* (young pupae), *Def* (larvae), and *Mtk* (old pupae) for which a Mann-Whitney test was used).

## Fig. S2 Comparison of different macrophage markers

The Fig. shows 22 APF old pupal brains stained for Repo (green) to label glial nuclei, HRP (cyan) to indicate neuronal membranes and anti-mCherry to detect the activity of the indicated enhancer elements. **(A)** *Hml* $\Delta^{dsRed}$ . **(B)** *srpHemo-H2A::3xmCherry*. **(C)** *srpHemo-moe::3xmCherry*. **(A'-C')** show the expression of the macrophage marker only. The asterisk in C' shows a set of 6 neurons. Scale bar is 100  $\mu$ m.

## Fig. S3 Differential effects of *Pvf2* expression

**(A)** Brains of wandering third instar larvae and different pupal stages with pan-glial expression of *Pvf2* were subjected to quantitative real-time PCR (*PGRP-SA*, *PGRP-LC*, *PGRP-LE*, *Pvf2*, *AttacinD*, *Diptericin*, *Defensin*, *Metchnikowin*, (n = 4 – 8)),  $p_{PGRP-SA \text{ larvae}} = 0.8703$ ,  $p_{PGRP-SA \text{ 5-12hAPF}} = 0.2$ ,  $p_{PGRP-SA \text{ 15-18hAPF}} = 0.0026$ ;  $p_{PGRP-LC \text{ larvae}} = 0.004$ ,  $p_{PGRP-LC \text{ 5-12hAPF}} = 0.8286$ ,  $p_{PGRP-LC \text{ 15-18hAPF}} = 0.0105$ ;  $p_{PGRP-LE \text{ larvae}} = 0.0162$ ,  $p_{PGRP-LE \text{ 5-12hAPF}} = 0.0709$ ,  $p_{PGRP-LE \text{ 15-18hAPF}} = 0.4569$ ;  $p_{Pvf2 \text{ larvae}} = 0.004$ ,  $p_{Pvf2 \text{ 5-12hAPF}} = 0.0286$ ,  $p_{Pvf2 \text{ 15-18hAPF}} < 0.0001$ ;  $p_{AttD \text{ larvae}} = 0.6828$ ,  $p_{AttD \text{ 5-12hAPF}} = 0.0286$ ,  $p_{AttD \text{ 15-18hAPF}} = 0.0040$ ;  $p_{DptB \text{ larvae}} = 0.004$ ,  $p_{DptB \text{ 5-12hAPF}} = 0.0286$ ,  $p_{DptB \text{ 15-18hAPF}} = 0.0709$ ;  $p_{Def \text{ larvae}} = 0.2532$ ,  $p_{Def \text{ 5-12hAPF}} = 0.2432$ ,  $p_{Def \text{ 15-18hAPF}} = 0.9253$ ;  $p_{Mtk \text{ larvae}} = 0.9253$ ,  $p_{Mtk \text{ 5-12hAPF}} = 0.0639$ ,  $p_{Mtk \text{ 15-18hAPF}} = 0.0249$ ; all p values were obtained using a Mann-Whitney test, except for *PGRP-SA* (larvae, old pupae), *PGRP-LC* (old pupae), *PGRP-LE* (young old pupae), *Pvf2* (old pupae), *DptB* (old pupae), *Def* (larvae, young pupae), and *Mtk* (young and old pupae) for which a t-test was used. **(B-D)** Brains of indicated age stained for mCherry expressing macrophages and glial nuclei (anti-Repo, green). **(B,B')** Induction of *Pvf2* at the onset of pupal development (0 h APF) is sufficient to trigger invasion of macrophages (arrows), however, fewer cells are found in the CNS compared to those that express *Pvf2*

throughout development in a pan-glial manner. **(C,D)** Adult specific pan-glial expression of *Pvf2* does not cause invasion of macrophages into the brain. Scale bars are 100  $\mu\text{m}$ .

**Fig. S4 Invading macrophages explore the surface of the subperineurial glia**

Electron microscopic images of a 12 h APF pupal brain. **(A)** Overview, the boxed area is shown in **(B,C)**. A macrophage ( $M\phi$ ), that can be recognized by many large vesicles, sitting between perineurial (PG) glial cells is exploring the surface of a subperineurial glial cell (SPG). Neuronal nuclei (N). **(D,E)** A macrophage (colorized in purple) trapped between perineurial glia and subperineurial glia contacts the intact septate junctions (SJ) of the subperineurial glia (arrowheads in E). Scale bars are as indicated.

**Fig. S5 Activation of the Toll pathway is not sufficient to trigger macrophage invasion**

Pupal brains of the indicated age stained for glial nuclei (anti-Repo, green), and invading macrophages (mCherry, magenta). **(A,B)** Activation of the Toll pathway by either suppressing *cactus* expression or by overexpression of *Toll* does not result in the invasion of macrophages into the pupal brain. **(C)** Pan-neuronal expression of *PGRP-LE* does not trigger invasion of macrophages into the pupal brain. **(D)** *Glilotactin-Gal4* mediated expression of *PGRP-LC* leads to the infiltration of some macrophages into the brain (arrowheads). Scale bars are 100  $\mu\text{m}$ .

**Fig. S6 The blood-brain barrier is maintained during early pupal stages**

Quantification of control brains [*repo-Gal4, UAS-GFPdsRNA*] for the BBB integrity. **(A,B)**

Penetration of fluorescein-labelled 70 kDa dextran during different developmental stages.

L3: wandering third instar larva, 5 h APF, 24 h APF and 48 h APF. **(B)** Quantification of

changes in fluorescence uptake after 40 min at different developmental time points as

indicated. No significant changes can be detected. **(C,D)** Penetration of Texas-red-labelled 10

kDa dextran during the same time points as in **(A)**. **(D)** Quantification of fluorescence changes

between the developmental stages indicated (L3 vs 5 h APF:  $p = 0.0159$ , 5h APF vs 24 h APF:

$p = 0.0317$ , 24 h APF vs 48 h  $p = 0.3095$ ).

**Fig. S7 The blood-brain barrier is maintained during early pupal stages**

Pupal brains of the indicated age stained for GFP (green), the septate junction component

NrxIV (magenta) and neuronal cell membranes (anti-HRP, cyan). *LexAop-GFP* is expressed in

subperineurial glial cells using *GMR54C07-LexA*. Note that subperineurial glial cells are

always present at the brain surface. Occasional holes can be detected at variable positions

indicating preparation artefacts. Scale bars are 100  $\mu\text{m}$ .

**Fig S8. *Pseudomonas aeruginosa* infection**

**A-F)** Confocal images (top and orthogonal views) showing *Pseudomonas aeruginosa* (in green) attached to the BBB (*mdr65-tomato* in magenta) (A-C) or inside the brain (D-F) upon *ex vivo* infections of late 3<sup>rd</sup> instar larval brain. Lower right images representing close-up of the dotted boxes showing attached or infiltrated bacteria. DAPI is in blue. **G)** Wandering

third instar *Drosophila* larvae injected with mock or *Pseudomonas aeruginosa* were dissected 4-5 h after infection and the brains were subjected to quantitative real-time PCR (qPCR; *Pvf2*, *PGRP-LE*, *PGRP-SA*, *Tl*, *DI*, *Dif*, *Rel*, *AttacinD*, *Diptericin*, *Defensin* (n=5); *PGRP-LC* (n=2); *Metchnikowin* (n=3)). Expression of the genes *Pvf2*, *Dif* were upregulated and *AttacinD* and *Defensin* were downregulated. Mann-Whitney tests were performed for each gene

between Non-infected and infected CNS.  $p_{Pvf2 \text{ non-infected vs infected}}=0.0317$  ;  $p_{PGRP-LE \text{ non-infected vs infected}} > 0.9999$  ;  $p_{PGRP-LC \text{ non-infected vs infected}} = 0.6667$ ;  $p_{PGRP-SA \text{ non-infected vs infected}} = 0.2222$ ;  $p_{Toll (Tl) \text{ non-infected vs infected}} = 0.3095$ ;  $p_{Dorsal (DI) \text{ non-infected vs infected}} = 0.6905$ ;  $p_{Dif \text{ non-infected vs infected}} = 0.0079$ ;  $p_{Relish (Rel) \text{ non-infected vs infected}} = 0.6905$ ;  $p_{AttacinD \text{ non-infected vs infected}} = 0.0238$  ;  $p_{Diptericin \text{ non-infected vs infected}} = 0.4206$  ;  $p_{Defensin \text{ non-infected vs infected}} = 0.0079$ ;  $p_{Metchnikowin \text{ non-infected vs infected}} = 0.4000$ .

# A Repo-Gal4 > PGRP-LC, L3

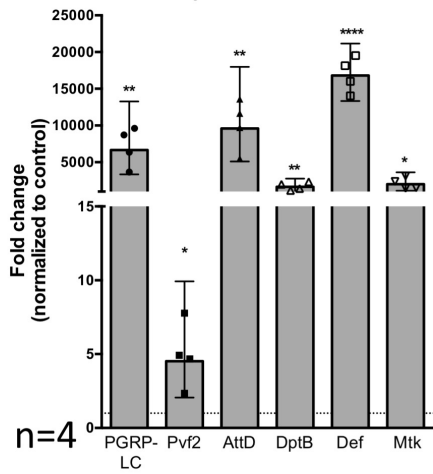

# B Repo-Gal4 > PGRP-LE

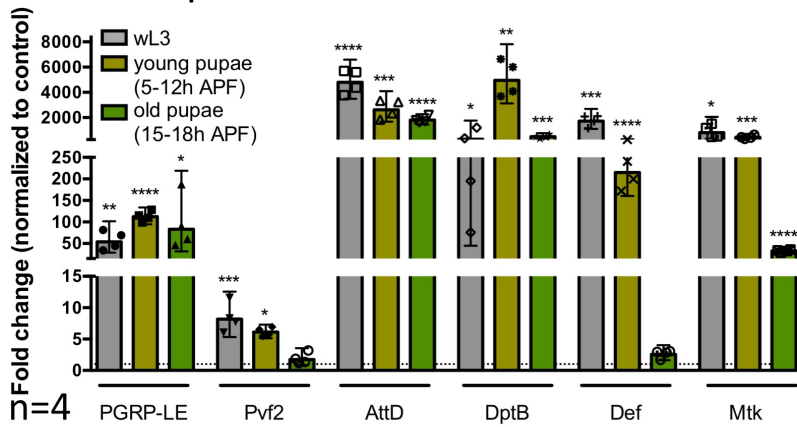

# C Repo-Gal4 > PGRP-SA, GNBP1

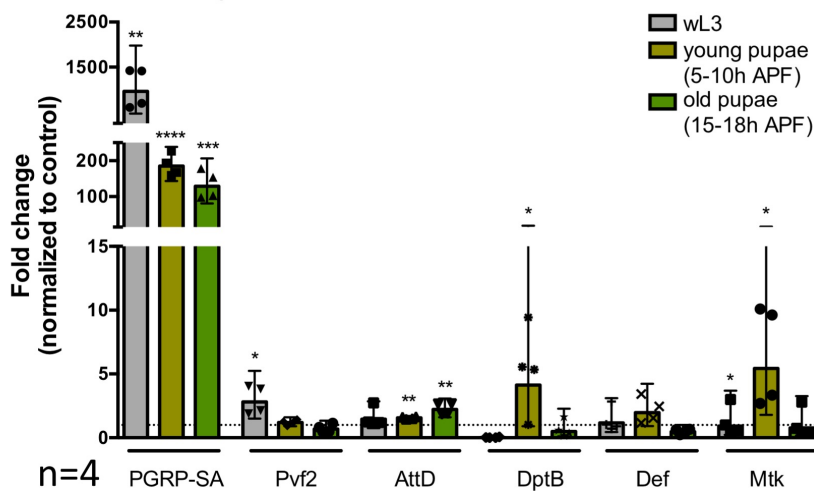

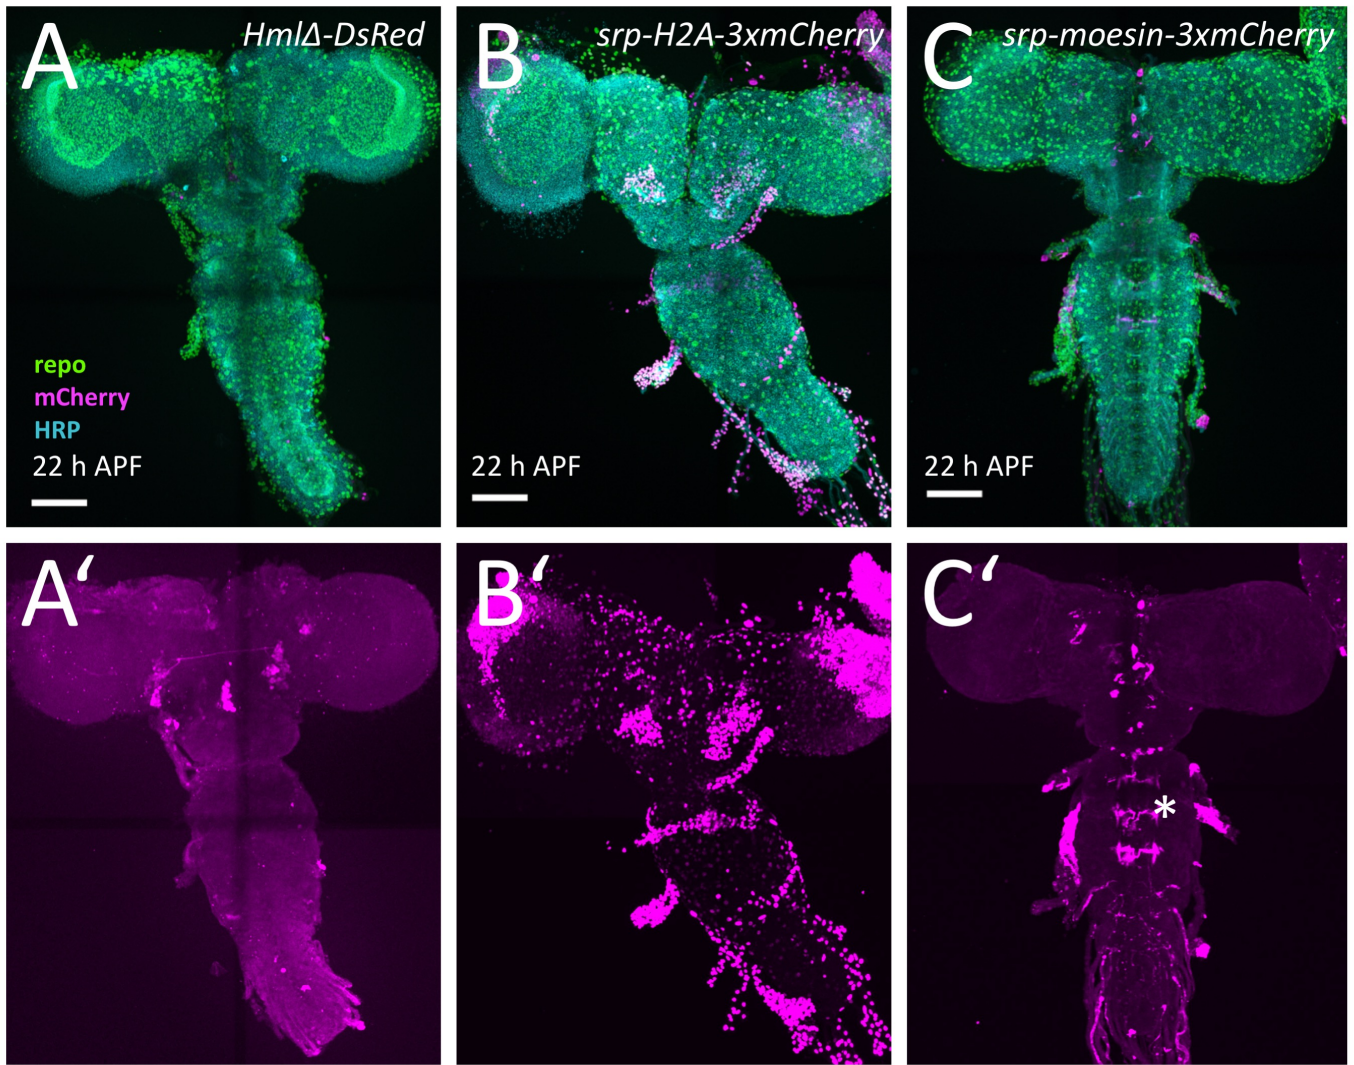



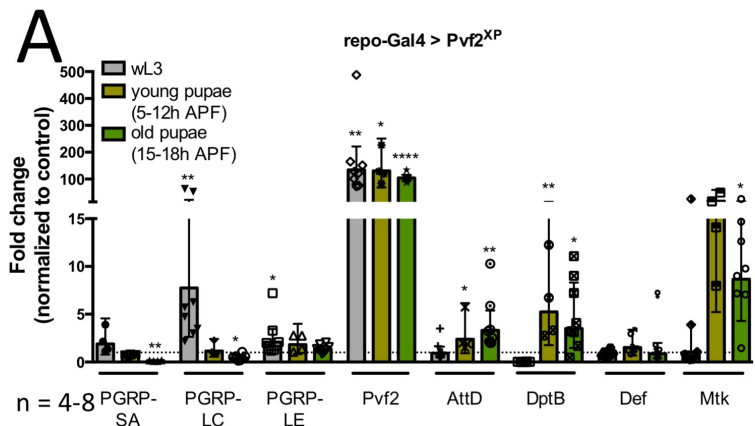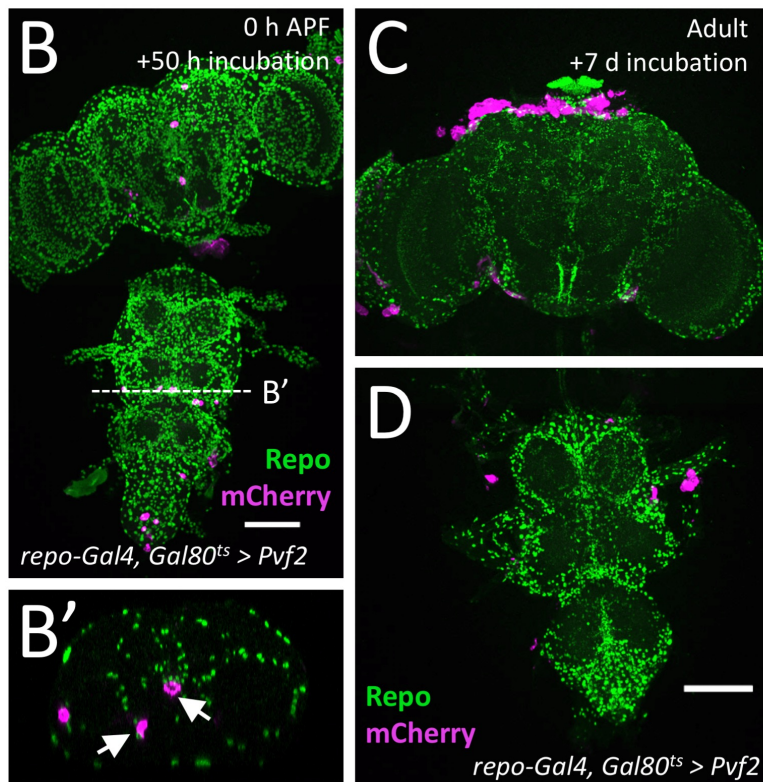

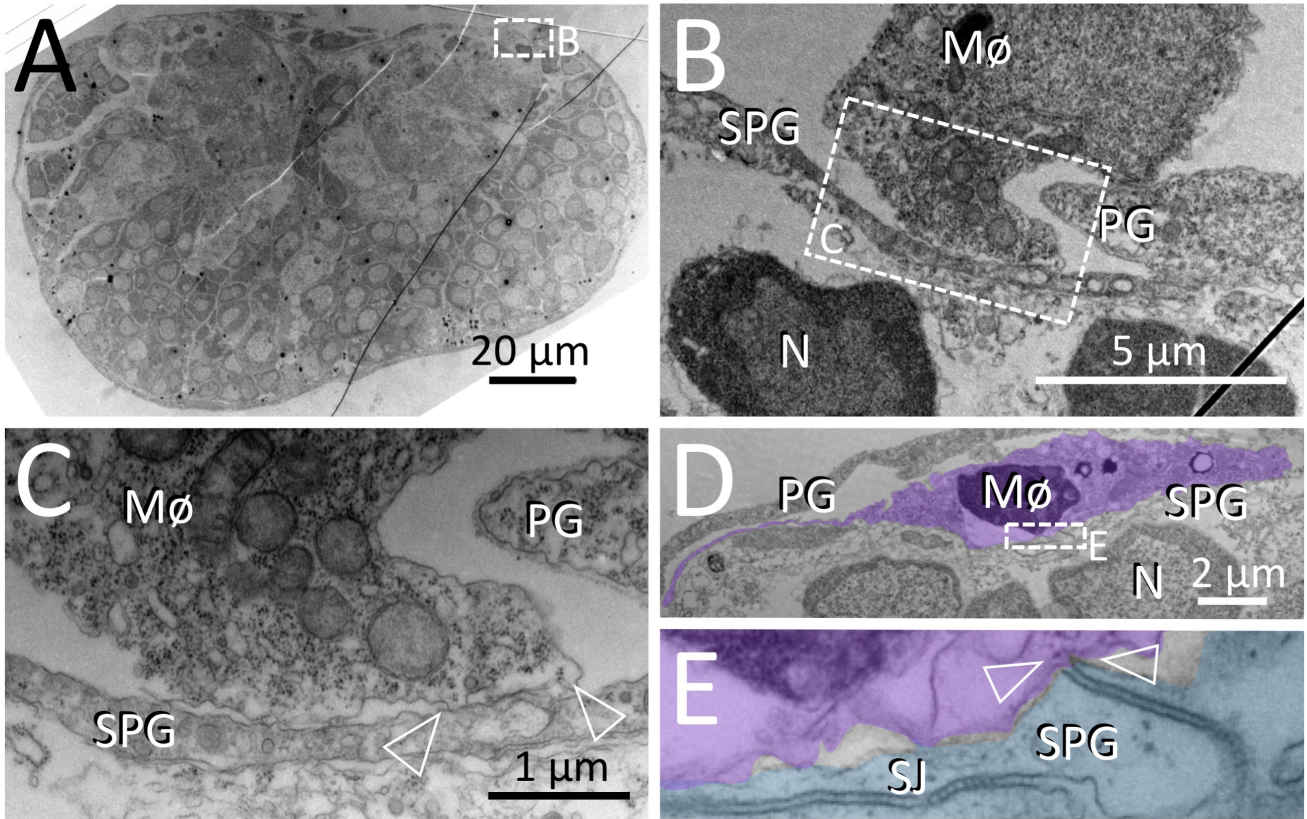

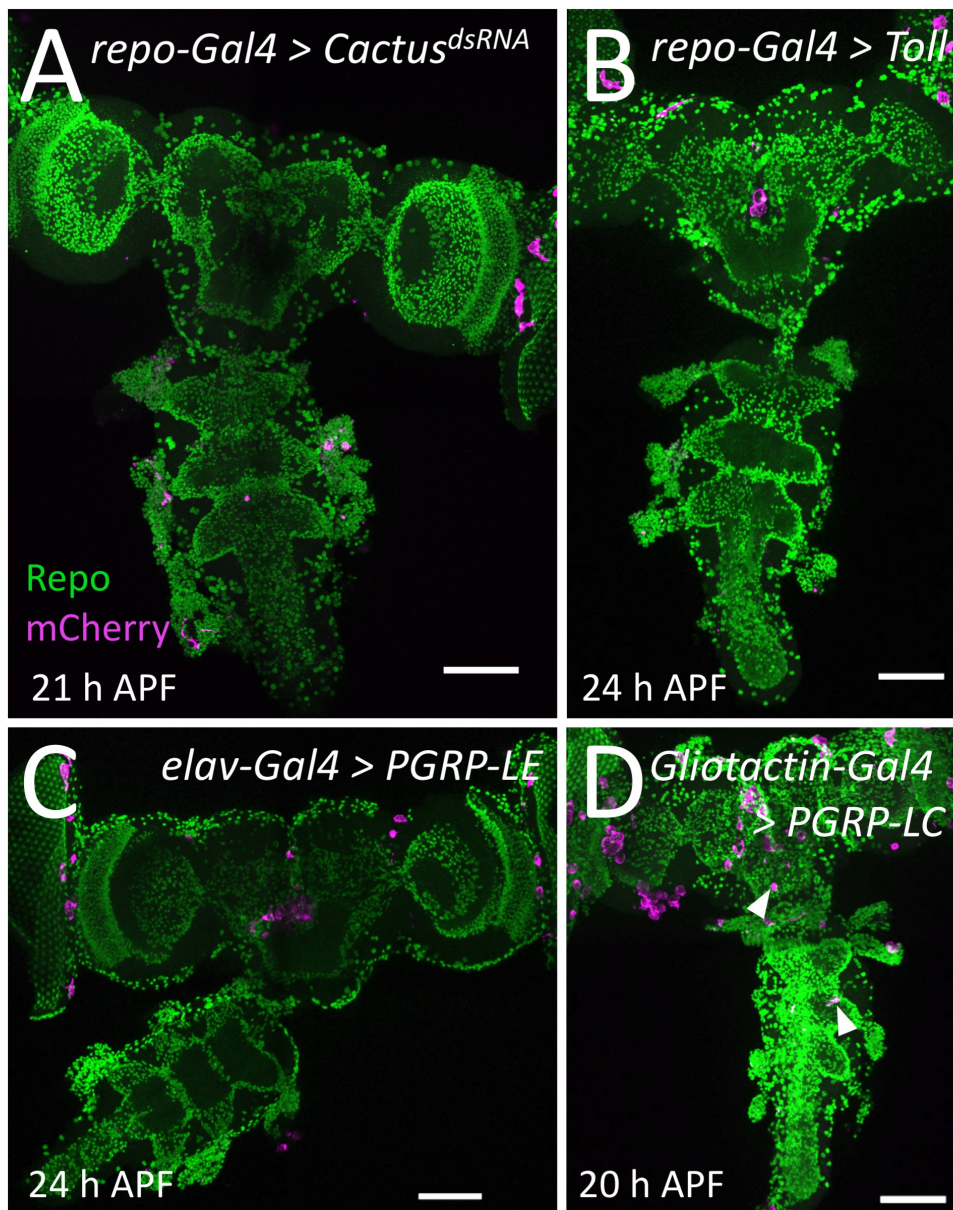

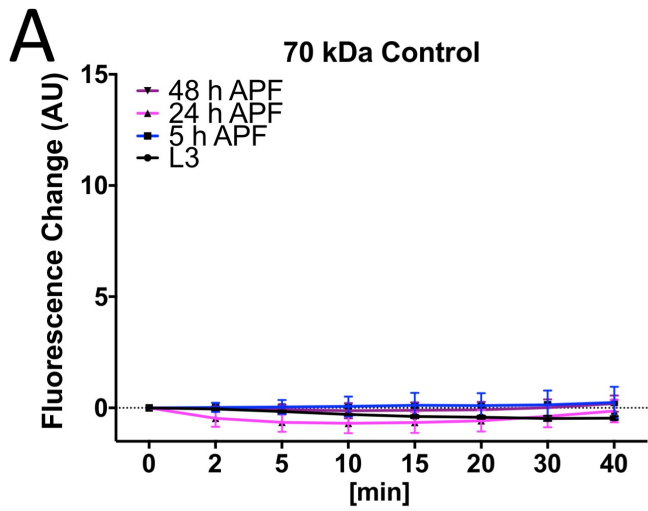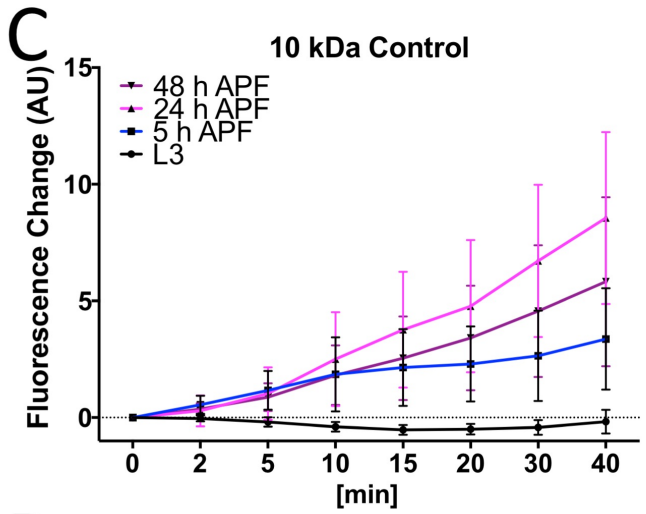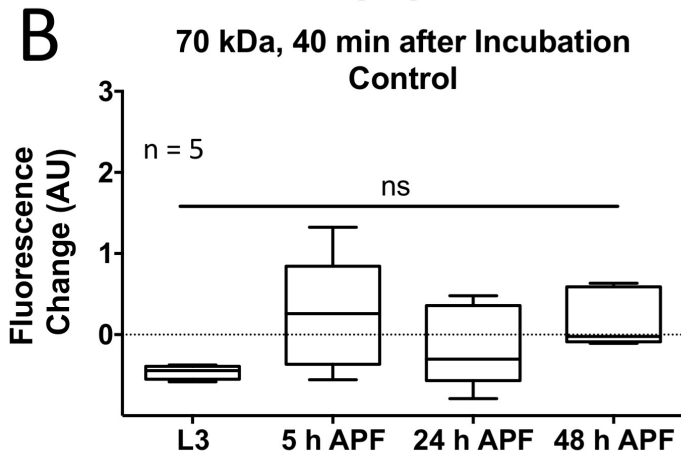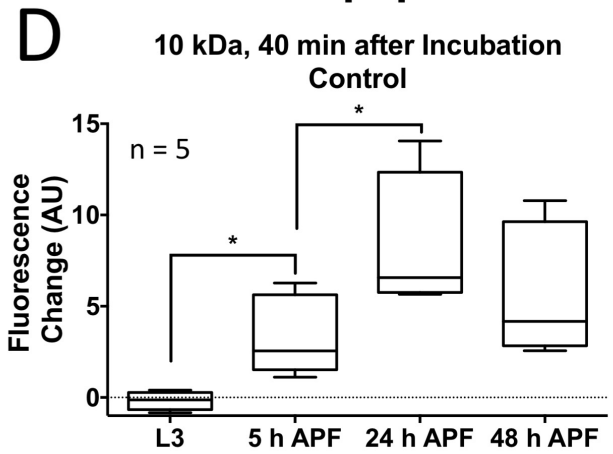

*GMR54C07-LexA > CD8GFP*

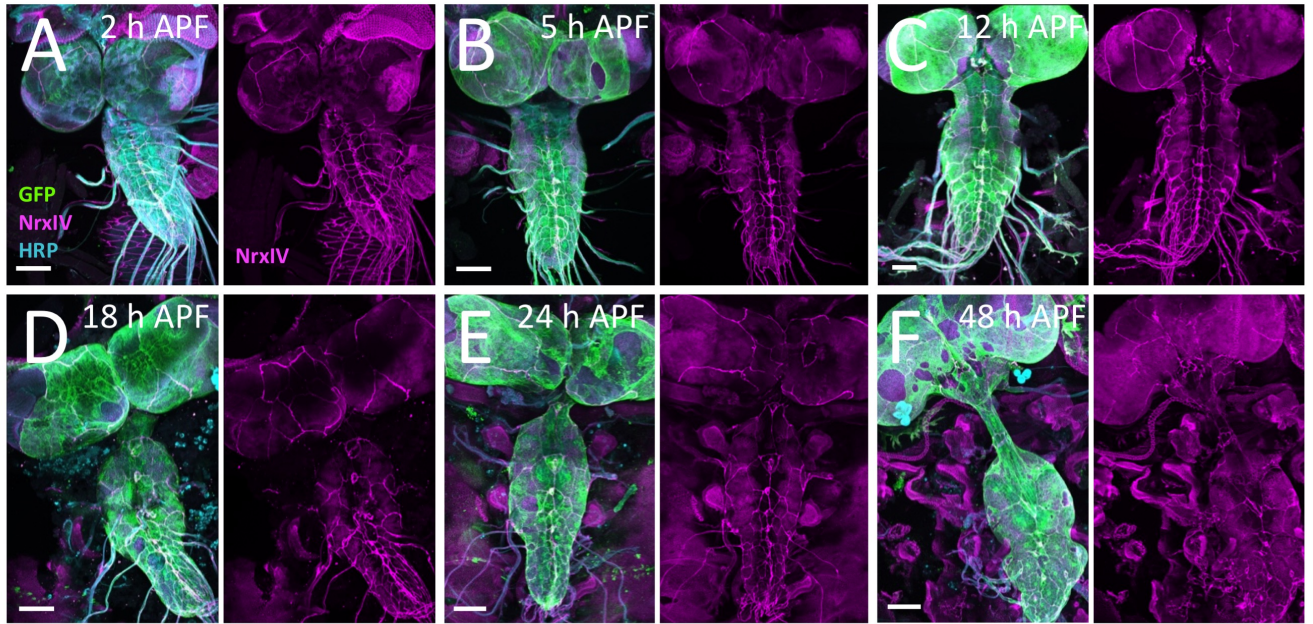

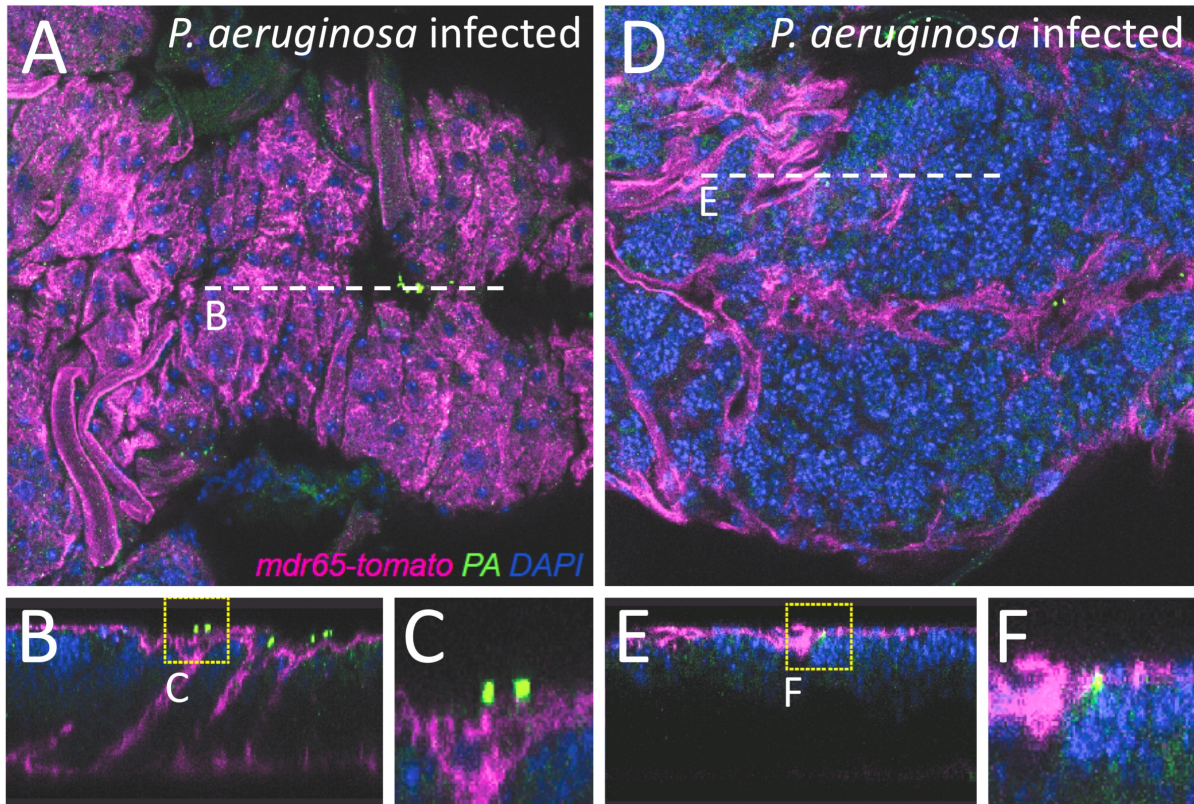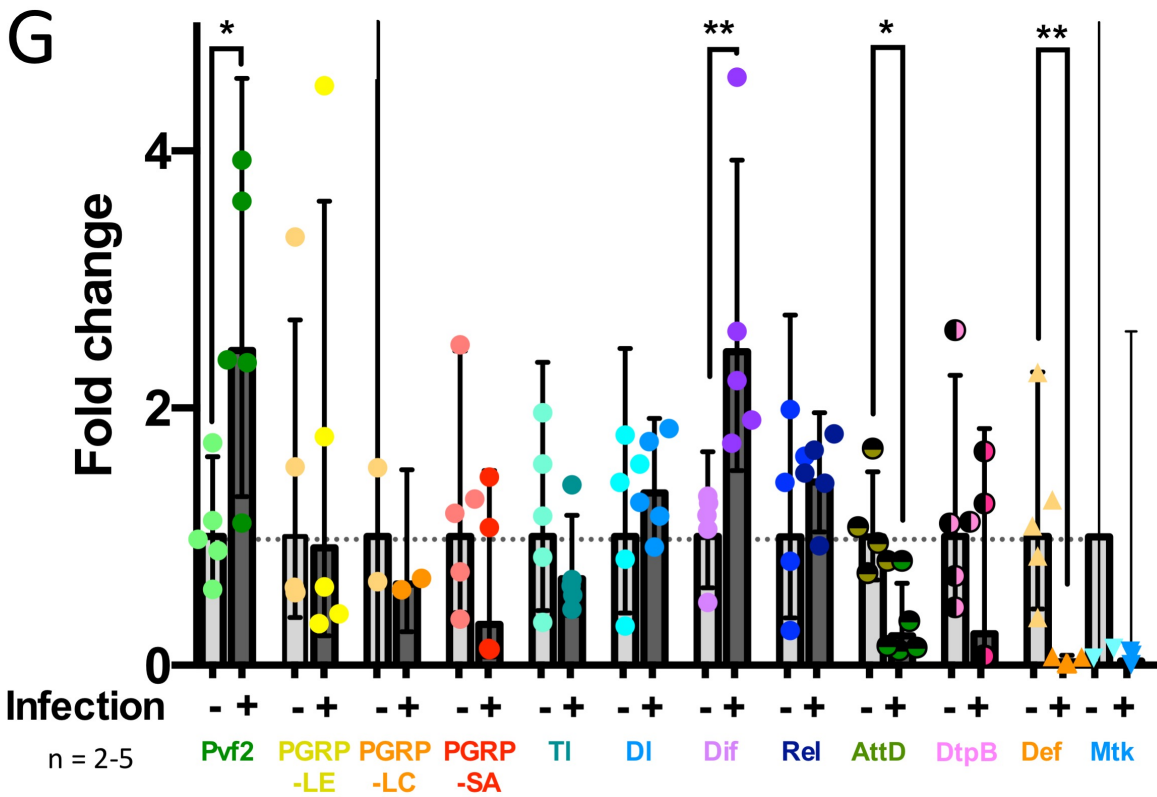

Supplement: sciadv.abh0050_sm.pdf [file sciadv.abh0050_sm.pdf]
